# Supplementary material for: Adapting the DOTS Framework for Tuberculosis Control to the Management of Non-Communicable Diseases in Sub-Saharan Africa
Source: PLOS journal article supplement (doi:10.1371/journal.pmed.0050124), 2008-06-04
Supplement: S2 (10.1371/journal.pmed.0050124.s002) [file journal.pmed.0050124.s002]

**Text S2: Monitoring Templates for patients with diabetes mellitus, hypertension and epilepsy**

**Diabetes mellitus: Name________________ Register Number____________________ Year________________**

| **Month** | **Date** | **Weight**  **Kg** | **Height**  **cm** | **Blood**  **Glucose** | **Blood**  **Pressure** | **Primary Outcome Status** | | | | | **Medication** | | **Complications** | | | | |
| --- | --- | --- | --- | --- | --- | --- | --- | --- | --- | --- | --- | --- | --- | --- | --- | --- | --- |
| **Alive** | **Dead** | **Default** | **Stop** | **Transfer** | **Insulin**  **Dose** | **Oral med**  **dose** | **Eyes** | **Neuropathy** | **Vascular Disease** | **Renal**  **Disease** | **Other** |
| **Jan** |  |  |  |  |  |  |  |  |  |  |  |  |  |  |  |  |  |
| **Feb** |  |  |  |  |  |  |  |  |  |  |  |  |  |  |  |  |  |

Legend: (would need appropriate abbreviations)

Blood Glucose : would need to indicate fasting or random; Insulin: Soluble (S), Lente (L), depending on the types of insulin available; Oral medication: Glibenclamide (G), Metformin (M), depending on drugs available; Eyes: cataracts (CA), background retinopathy (BR), proliferative retinopathy (PR); Neuropathy: peripheral sensory neuropathy (PSN), motor neuropathy (MN), autonomic neuropathy (AN); Vascular disease: coronary artery disease (CAD), cerebrovascular disease (CVD), peripheral vascular disease (PVD); Renal disease: microalbuminuria (MU), proteinuria (UP), raised blood urea (BU); Other: E.G., foot and hand ulceration (Ulcer), erectile dysfunction (ED)

**Hypertension: Name_____________________ Register Number ________________________ Year ________________**

| **Month** | **Date** | **Weight**  **Kg** | **Height**  **cm** | **Blood**  **Pressure** | **Blood**  **Glucose** | **Primary Outcome Status** | | | | | **Medication-**  **daily dose** | **Complications** | | | | |
| --- | --- | --- | --- | --- | --- | --- | --- | --- | --- | --- | --- | --- | --- | --- | --- | --- |
| **Alive** | **Dead** | **Default** | **Stop** | **Transfer** | **Eyes** | **Cardio-vascular**  **disease** | **Cerebro-**  **vascular**  **disease** | **Renal**  **Disease** | **Other** |
| **Jan** |  |  |  |  |  |  |  |  |  |  |  |  |  |  |  |  |
| **Feb** |  |  |  |  |  |  |  |  |  |  |  |  |  |  |  |  |

Legend: (would need appropriate abbreviations for drugs, depending on what is available)

Medication: propranolol (P), bendrofluazide (BF), methyldopa (MD), captopril (C), etc

**Epilepsy: Name____________________ Register Number______________________ Year _________________**

| **Month** | **Date** | **Age** | **Weight**  **Kg** | **Primary Outcome Status** | | | | | **Medication with dose** | | | | **No seizures in**  **last month** | **Number of seizures in last month** | **Status epilepticus**  **in last month** |
| --- | --- | --- | --- | --- | --- | --- | --- | --- | --- | --- | --- | --- | --- | --- | --- |
| **Alive** | **Dead** | **Default** | **Stop** | **Transfer** | **PB** | **PH** | **CB** | **SV** |
| **Jan** |  |  |  |  |  |  |  |  |  |  |  |  |  |  |  |
| **Feb** |  |  |  |  |  |  |  |  |  |  |  |  |  |  |  |

Legend: (would need appropriate abbreviation for drugs, depending on national protocol)

Medication: phenobarbitone (PB), phenytoin (PH), carbamazepine (CB), sodium valproate (SV)
