# Supplementary material for: Adapting the DOTS Framework for Tuberculosis Control to the Management of Non-Communicable Diseases in Sub-Saharan Africa
Source: PLOS journal article supplement (doi:10.1371/journal.pmed.0050124), 2008-06-04
Supplement: S3 (10.1371/journal.pmed.0050124.s003) [file journal.pmed.0050124.s003]

**Résume des auteurs:**

- En Afrique sub-saharienne, les standards de prise en charge des maladies non-transmissibles (MNT) dans le service public sont faibles.
- Face au fardeau croissant que représentent les MNT, il est devenu impératif de développer et mette en place des protocoles de prise en charge de ces maladies ainsi que des systèmes de diagnostique, de traitement, de surveillance et de diffusion des données.
- Pendant plus d’une décennie, la stratégie de traitement sous observation directe (directly observed treatment strategy ou « DOTS ») a constitué le cadre de contrôle de la tuberculose, ce qui a permis à des millions de patients de pays parmi les plus pauvres au monde atteints de la maladie de bénéficier de services structurés et bien contrôlés.
- Le modèle « DOTS » a été adapté avec succès à la stratégie d’augmentation du nombre de traitements par thérapie antirétrovirale (TAR) au Malawi, ce qui permet à des milliers de patients de bénéficier de traitements structurés et de longue durée.
- Ce document aborde la raison pour laquelle le paradigme de la stratégie « DOTS » devrait être adapté aux MNT, et, en prenant pour référence les cinq piliers de cette stratégie « DOTS », montre la manière dont cela pourrait être mis en oeuvre et répliqué dans les pays à faibles revenus, en se référant plus spécialement à l’Afrique sub-saharienne.
