# Supplementary material for: Adapting the DOTS Framework for Tuberculosis Control to the Management of Non-Communicable Diseases in Sub-Saharan Africa
Source: PLOS journal article supplement (doi:10.1371/journal.pmed.0050124), 2008-06-04
Supplement: S4 (10.1371/journal.pmed.0050124.s004) [file journal.pmed.0050124.s004]

**Resumen de Autores:**

- En el África sub-Sahariana, los estándares de gestión para las enfermedades no transmisibles (ENTs) en los servicios públicos de salud son escasos.
- Ante la carga creciente causada por las ENTs, este es el momento para desarrollar e implementar protocolos de gestión estandarizados y sistemas de diagnóstico, tratamiento, vigilancia y reporte para las ENTs.
- Durante más de una década, la estrategia de tratamiento bajo observación directa (directly observed treatment stategy ou “DOTS”) ha constituido el marco de control para la tuberculosis, permitiendo a millones de pacientes tuberculosos en algunos de los países más pobres del mundo de benificiar de servicios estructurados y controlados.
- El modelo “DOTS” ha sido adaptado con éxito a la ampliación de tratamientos por terapia antiretroviral (TAR) en Malawi, lo que permite ofrecer un tratamiento estructurado y a largo plazo a miles de pacientes.
- Este documento discute por qué el paradigma del “DOTS” debería ser adaptado a las ENTs, y muestra, haciendo referencia a los cinco pilares de esta estrategia “DOTS”, cómo podría ser implementado y extendido en países con escasos recursos, con especial referencia al África sub-Sahariana.
